# Supplementary material for: Mechanism and regulation of LCST behavior in poly(hydroxypropyl acrylate)-based temperature-sensitive hydrogels
Source: Royal Society of Chemistry journal article supplement (doi:10.1039/d2ta04271a), 2022-01-01
Supplement: d2ta04271a1.pdf [file d2ta04271a1.pdf]

## Mechanism and regulation of LCST behavior in poly (hydroxypropyl acrylate)-based temperature-sensitive hydrogels

Fuping Chen, Guoqiang Lu, Hengda Yuan, Ruiqi Li, Jun Nie, Yingying Zhao, Xin Shu,  
Xiaoqun Zhu\*

State Key Laboratory of Chemical Resource Engineering, College of Materials  
Science and Engineering, Beijing University of Chemical Technology, Beijing  
100029, P. R. China

E-mail: [zhuxq@mail.buct.edu.cn](mailto:zhuxq@mail.buct.edu.cn)

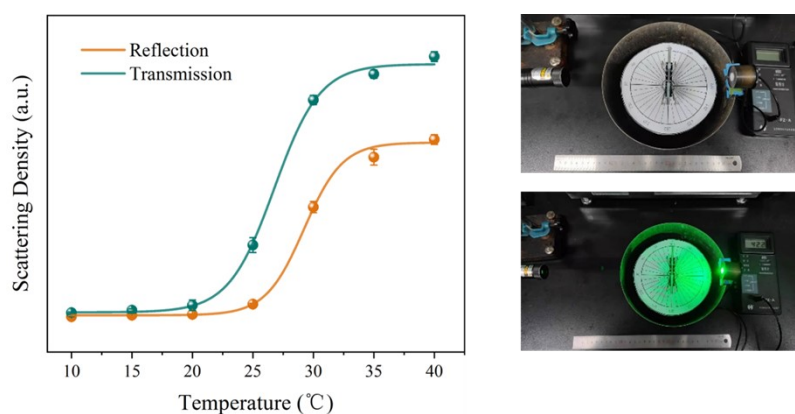

**Figure S1.** Variable temperature light scattering and experimental setup

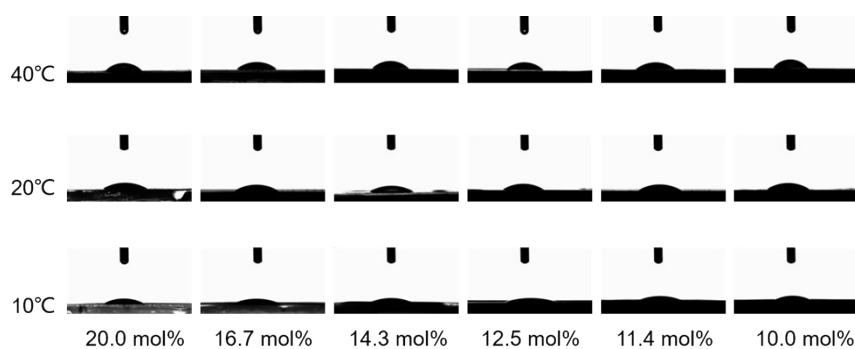

**Figure S2.** Photographs of the water contact angle of PHPA hydrogels with different solids contents at different temperatures.

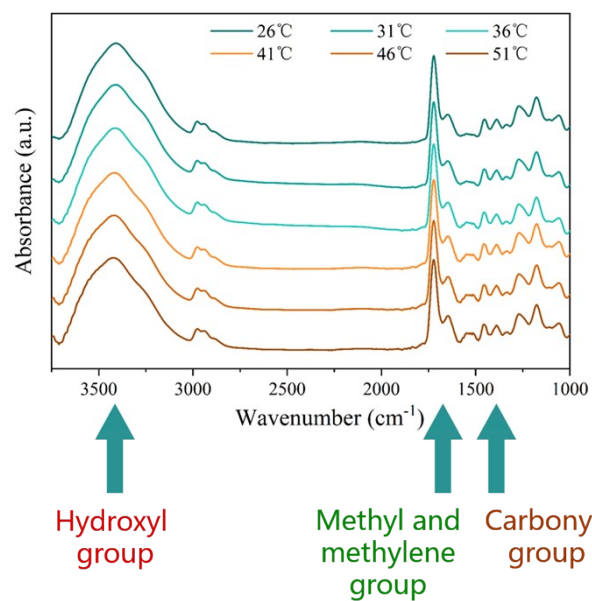

**Figure S3.** Variable temperature infrared spectra of PHPA hydrogels

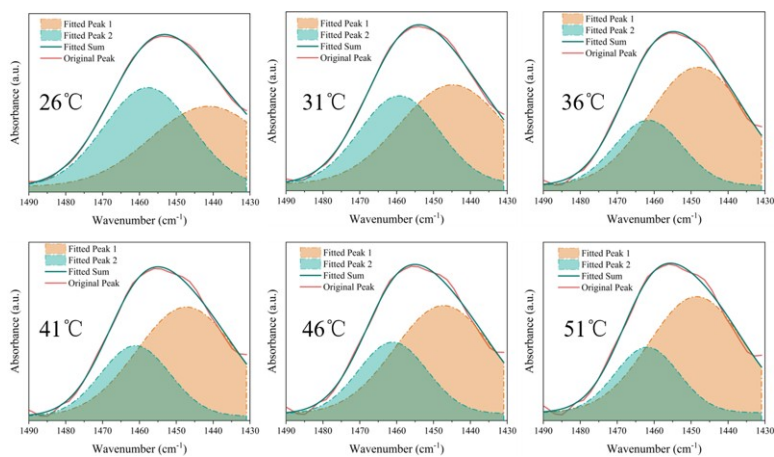

**Figure S4.** Infrared spectra at hydrocarbons at different temperatures

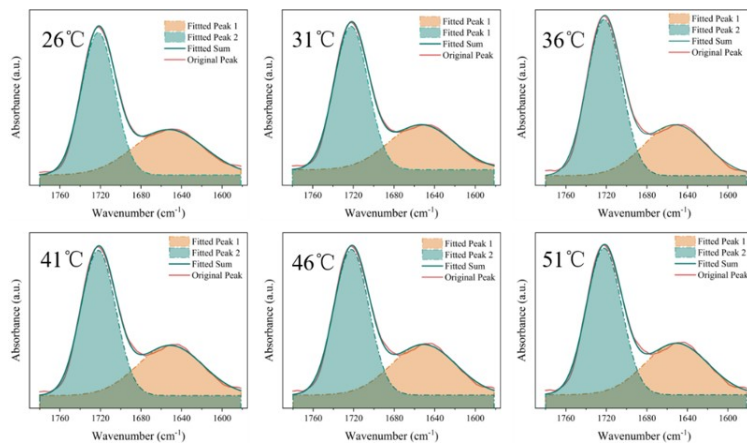

**Figure S5.** Infrared spectra at carbonyl groups at different temperatures

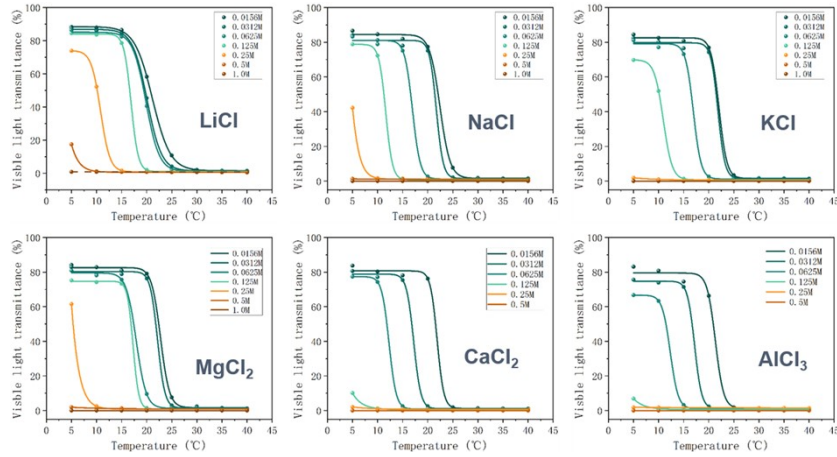

**Figure S6.** Permeability-temperature curves for different concentrations and different ions (cations as variables)

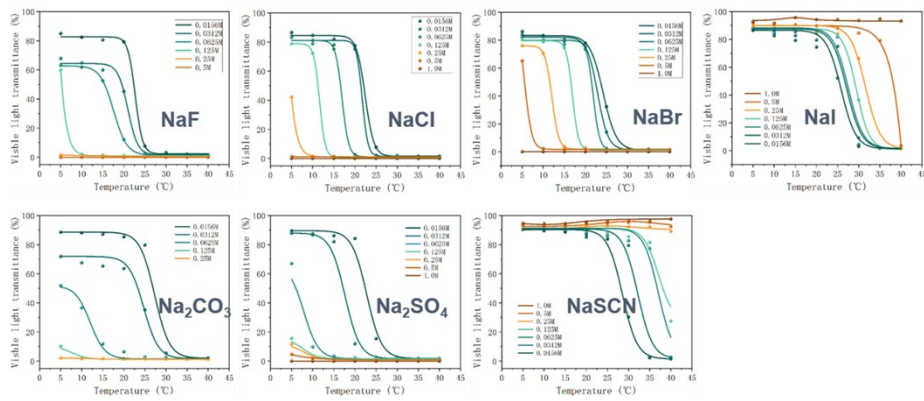

**Figure S7.** Permeability-temperature curves for different concentrations and different ions (anions as variable)

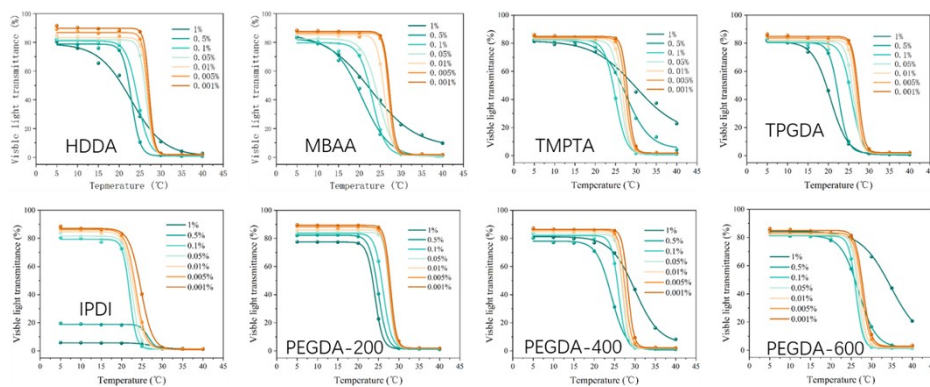

**Figure S8.** Transmittance-temperature curves for different concentrations and crosslinkers

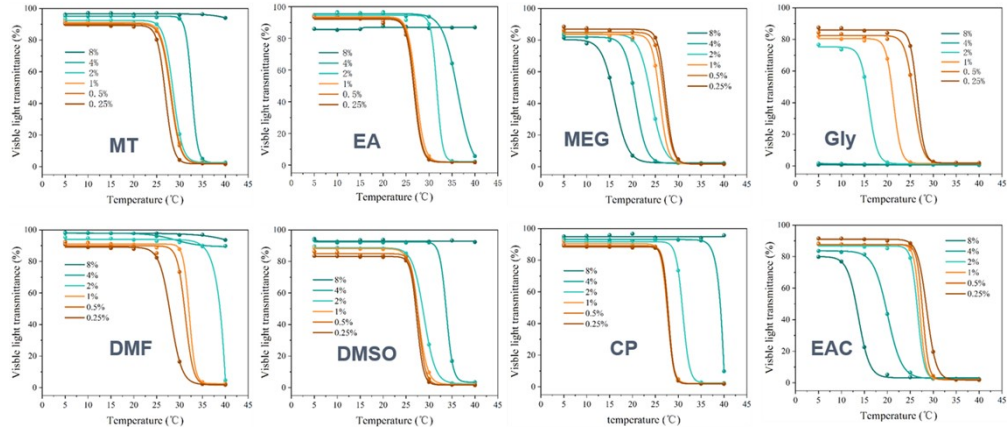

**Figure S9.** Permeability-temperature curves for different concentrations and co-solvents

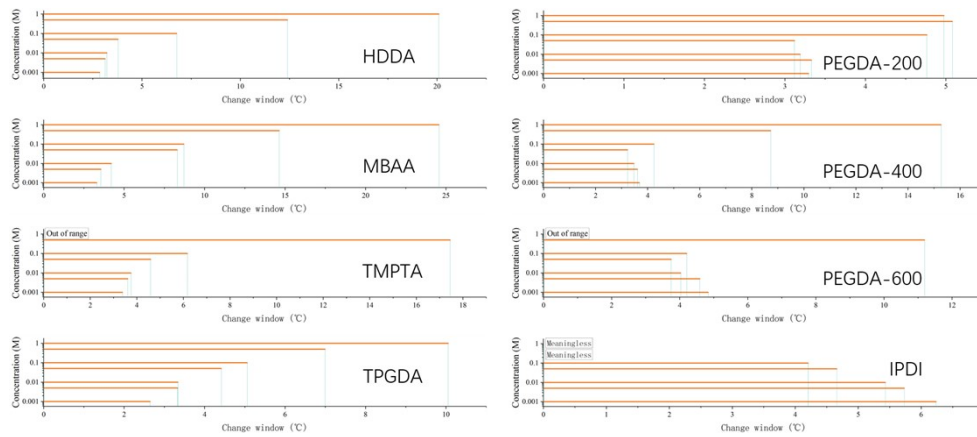

**Figure S10.** Transformation windows for different concentrations and different crosslinkers

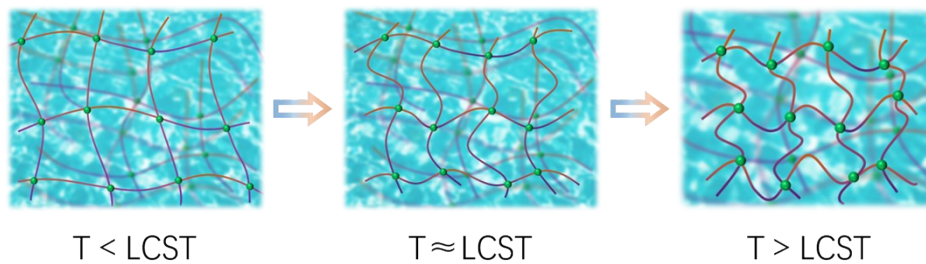

**Figure S11.** Variation of the crosslinking network inside the hydrogels with temperature, green balls represent double bond or hydroxyl crosslinking points

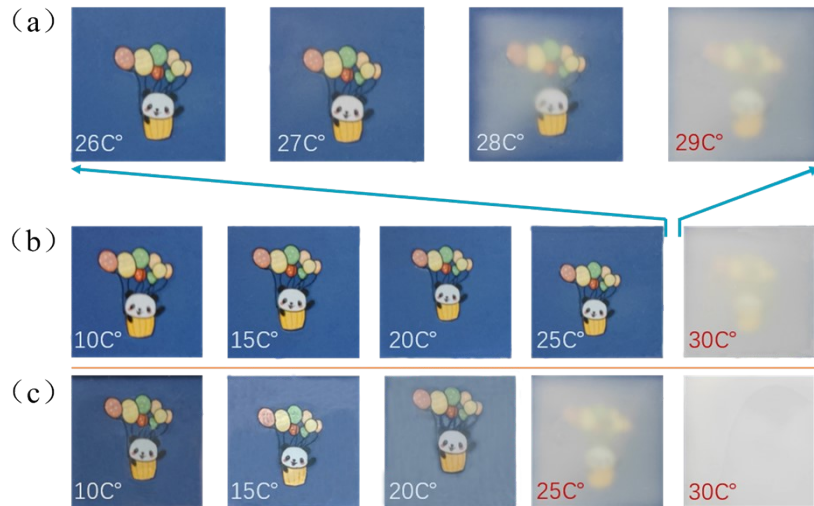

**Figure S12.** Digital photos of PHPA hydrogels with 0.5% MBAA (c) and the original hydrogel (b) at different temperatures; (a) is a detailed image of (b) at 25°C-30°C.

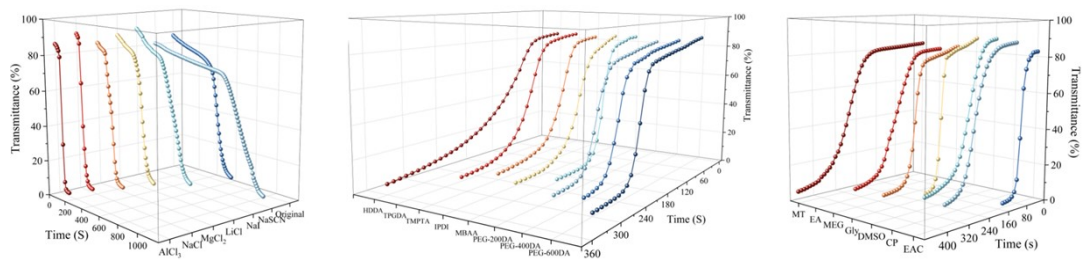

**Figure S13.** Shift times for different additives



**Table S1.** Mean and standard deviation of the water contact angle

|      |                     |            |           |           |           |           |           |
|------|---------------------|------------|-----------|-----------|-----------|-----------|-----------|
| 40C° | average             | 40.55      | 46.1      | 48.36667  | 55.28333  | 71.55     | 75.41667  |
|      | standard deviations | 1.0094553  | 1.850405  | 0.784007  | 1.144407  | 1.56812   | 1.126795  |
| 20C° | average             | 24.2333333 | 25.15     | 27.93333  | 32.4      | 34.76667  | 34.95     |
|      | standard deviations | 0.68313005 | 0.62849   | 1.697842  | 0.669328  | 0.94163   | 1.209545  |
| 10C° | average             | 23.8833333 | 21.23333  | 20.21667  | 20.26667  | 20.21667  | 22.6      |
|      | standard deviations | 1.49320684 | 0.67429   | 1.67023   | 1.003328  | 0.17224   | 0.876356  |
|      |                     | 20.0 mol%  | 16.7 mol% | 14.3 mol% | 12.5 mol% | 11.1 mol% | 10.0 mol% |

**Table S2.** Exploring the solubility of different ions

|                  | F <sup>-</sup> | Cl <sup>-</sup> | Br <sup>-</sup> | I <sup>-</sup> | NO <sub>3</sub> <sup>-</sup> | SO <sub>4</sub> <sup>2-</sup> | CO <sub>3</sub> <sup>2-</sup> | SCN <sup>-</sup> | Ac <sup>-</sup> |
|------------------|----------------|-----------------|-----------------|----------------|------------------------------|-------------------------------|-------------------------------|------------------|-----------------|
| Li <sup>+</sup>  | 1.0 M          | 1.0 M           | 1.0 M           | --             | --                           | --                            | --                            | --               | --              |
| Na <sup>+</sup>  | 0.25 M         | 0.5 M           | 0.5 M           | 1.0 M          | --                           | 0.25 M                        | 0.25 M                        | 0.25 M           | 0.25 M          |
| K <sup>+</sup>   | --             | 0.25 M          | --              | --             | --                           | 0.5 M                         | 0.25 M                        | 1.0 M            | --              |
| Ca <sup>2+</sup> | /              | 0.25 M          | --              | --             | 1.0 M                        | /                             | /                             | --               | --              |
| Mg <sup>2+</sup> | /              | 0.5 M           | --              | --             | --                           | 0.5 M                         | /                             | --               | --              |
| Cu <sup>2+</sup> | /              | 0.5 M           | 1.0 M           | /              | 1.0 M                        | 0                             | /                             | --               | --              |
| Mn <sup>2+</sup> | /              | 0.5 M           | --              | --             | --                           | --                            | /                             | --               | --              |
| Zn <sup>2+</sup> | /              | --              | --              | --             | --                           | 0.25 M                        | /                             | --               | 1.0M            |
| Fe <sup>2+</sup> | /              | 0.25 M          | --              | --             | --                           | 0.5 M                         | /                             | --               | --              |
| Fe <sup>3+</sup> | /              | 0               | --              | --             | 0.5 M                        | --                            | /                             | --               | --              |
| Co <sup>2+</sup> | /              | 0.25 M          | --              | --             | 1.0 M                        | --                            | /                             | --               | --              |
| Ni <sup>2+</sup> | /              | 0.5 M           | --              | --             | --                           | 0.25 M                        | /                             | --               | --              |
| Al <sup>3+</sup> | --             | 0.25 M          | --              | --             | --                           | --                            | /                             | --               | --              |
| Cd <sup>2+</sup> | /              | --              | --              | --             | 1.0 M                        | --                            | /                             | --               | --              |

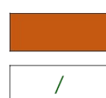

Colored and not light solid, number represents the maximum soluble amount

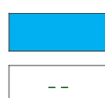

It can be cured by light, and the number indicates the maximum soluble amount

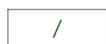

Insoluble, slightly soluble, or absent

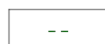

Soluble but not stored in laboratory

**Table S3.** comparison with other temperature-sensitive materials in the literature for transition temperature and transition time

| Number | Temperature-sensitive materials | Transition time (min) | Transition temperature (°C) | References |
|--------|---------------------------------|-----------------------|-----------------------------|------------|
| 1      | PHPA-AlCl <sub>3</sub>          | 0.5                   | 12                          | This Work  |
| 2      | PNVCL                           | 1                     | 34                          | [1]        |
| 3      | PNIPAAm-PVP                     | 2                     | 24                          | [2]        |
| 4      | P(NIPAAm-co-N-MAGEL)            | 2                     | 27                          | [3]        |
| 5      | Thermochromic Ionogel           | 3                     | 55                          | [4]        |
| 6      | Ionic liquid elastomer          | 4                     | 45                          | [5]        |
| 7      | Nanocomposite Hydrogel          | 4                     | 26                          | [6]        |
| 8      | VSP microgel                    | 4                     | 28                          | [7]        |
| 9      | GO+PNIPAM                       | 5                     | 29                          | [8]        |

|    |                               |    |    |           |
|----|-------------------------------|----|----|-----------|
| 10 | Dual-responsive starch        | 5  | 37 | [9]       |
| 11 | pNIPAm-AEMA                   | 7  | 32 | [10]      |
| 12 | PHPA-NaSCN                    | 7  | 37 | This Work |
| 13 | PDAPs/PNIPAm                  | 8  | 36 | [11]      |
| 14 | PNIPAm/CNC                    | 9  | 31 | [12]      |
| 15 | ATO/Hydrogel                  | 10 | 33 | [13]      |
| 16 | CsxWO <sub>3</sub> /PAM-PNIPA | 10 | 30 | [14]      |

- [1] Sala R L, Gonçalves R H, Camargo E R, et al. Thermosensitive poly(N-vinylcaprolactam) as a transmission light regulator in smart windows[J]. *Solar Energy Materials and Solar Cells*, 2018, 186: 266-272.
- [2] Wang M, Gao Y, Cao C, et al. Binary Solvent Colloids of Thermosensitive Poly(N-isopropylacrylamide) Microgel for Smart Windows[J]. *Industrial & Engineering Chemistry Research*, 2014, 53(48): 18462-18472.
- [3] Xin F, Lu Q, Liu B, et al. Metal-ion-mediated hydrogels with thermo-responsiveness for smart windows[J]. *European Polymer Journal*, 2018, 99: 65-71.
- [4] Lee H Y, Cai Y, Velioglu S, et al. Thermochromic Ionogel: A New Class of Stimuli Responsive Materials with Super Cyclic Stability for Solar Modulation[J]. *Chemistry of Materials*, 2017, 29(16): 6947-6955.
- [5] Ho T Y K, Ankit, Febriansyah B, et al. Inducing thermoreversible optical transitions in urethane-acrylate systems via ionic liquid incorporation for stretchable smart devices[J]. *Journal of Materials Chemistry A*, 2021, 9(23): 13615-13624.
- [6] Xu Z, Wang S, Hu X-Y, et al. Sunlight-Induced Photo-Thermochromic Supramolecular Nanocomposite Hydrogel Film for Energy-Saving Smart Window[J]. *Solar RRL*, 2018, 2(11).
- [7] Zhang R, Xiang B, Shen Y, et al. Energy-efficient smart window based on a thermochromic microgel with ultrahigh visible transparency and infrared transmittance modulation[J]. *Journal of Materials Chemistry A*, 2021.
- [8] Chou H-T, Chen Y-C, Lee C-Y, et al. Switchable transparency of dual-controlled smart glass prepared with hydrogel-containing graphene oxide for energy efficiency[J]. *Solar Energy Materials and Solar Cells*, 2017, 166: 45-51.
- [9] Zhang K, Shi Y, Wu L, et al. Thermo- and pH-responsive starch derivatives for smart window[J]. *Carbohydr Polym*, 2018, 196: 209-216.
- [10] Li X-H, Liu C, Feng S-P, et al. Broadband Light Management with Thermochromic Hydrogel Microparticles for Smart Windows[J]. *Joule*, 2019, 3(1): 290-302.
- [11] Tian J, Gu J, Peng H, et al. Sunlight-driven photo-thermochromic hybrid hydrogel with fast responsiveness and durability for energy efficient smart windows[J]. *Composites Part A: Applied Science and Manufacturing*, 2021, 149.
- [12] Sun X, Tyagi P, Agate S, et al. Unique thermo-responsivity and tunable optical performance of poly(N-isopropylacrylamide)-cellulose nanocrystal hydrogel films[J]. *Carbohydr Polym*, 2019, 208: 495-503.
- [13] Lee H Y, Cai Y, Bi S, et al. A Dual-Responsive Nanocomposite toward Climate-Adaptable Solar Modulation for Energy-Saving Smart Windows[J]. *ACS Appl Mater Interfaces*, 2017,

9(7): 6054-6063.

- [14] Wu M, Shi Y, Li R, et al. Spectrally Selective Smart Window with High Near-Infrared Light Shielding and Controllable Visible Light Transmittance[J]. ACS Appl Mater Interfaces, 2018, 10(46): 39819-39827.
